# Supplementary material for: Improving the temperature-sensing performance of the SrZn0.33Nb0.67O3:Pr3+ phosphor via Ga3+ doping
Source: Royal Society of Chemistry journal article supplement (doi:10.1039/d1ma01247a), 2022-01-01
Supplement: d1ma01247a1.pdf [file d1ma01247a1.pdf]

## Supplementary Information

### Improving temperature sensing performance of $\text{SrZn}_{0.33}\text{Nb}_{0.67}\text{O}_3: \text{Pr}^{3+}$ phosphor via $\text{Ga}^{3+}$ doping

Yan Cui, Yan Gao,\* Zhichao Meng, Tao Hu, Yeqing Chen, Yan Chen and Qingguang Zeng\*

School of Applied Physics and Materials, Wuyi University, Jiangmen 529020, Guangdong Province, P.R. China.

\*Corresponding author. E-mail: gaoyan\_chn@sina.com; zengqg@mail.ustc.edu.cn

Fig. S1

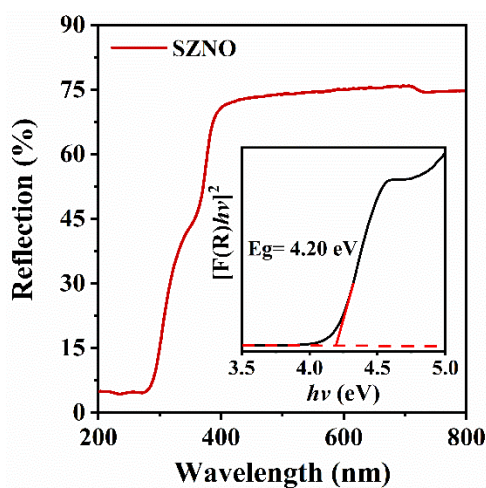

Fig. S1 The ultraviolet visible diffuse reflectance spectra (UV vis DRS) of the  $\text{SrZn}_{0.33}\text{Nb}_{0.67}\text{O}_3$  host.

Fig. S2

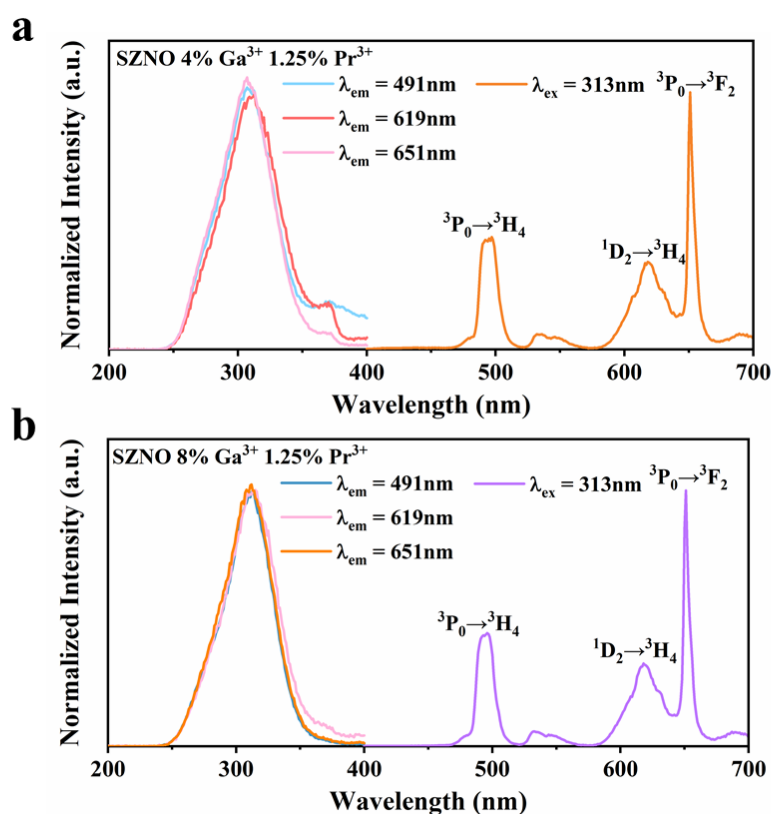

Fig. S2 The PL spectrum ( $\lambda_{ex}=313\text{ nm}$ ) and PLE spectra ( $\lambda_{em} = 491\text{ nm}$ ,  $619\text{ nm}$ ,  $651\text{ nm}$ ) of the (a)  $\text{SrZn}_{0.33}\text{Nb}_{0.67}\text{O}_3$ : 4%  $\text{Ga}^{3+}$ , 1.25%  $\text{Pr}^{3+}$  and (b)  $\text{SrZn}_{0.33}\text{Nb}_{0.67}\text{O}_3$ : 8%  $\text{Ga}^{3+}$ , 1.25%  $\text{Pr}^{3+}$ .

Fig. S3

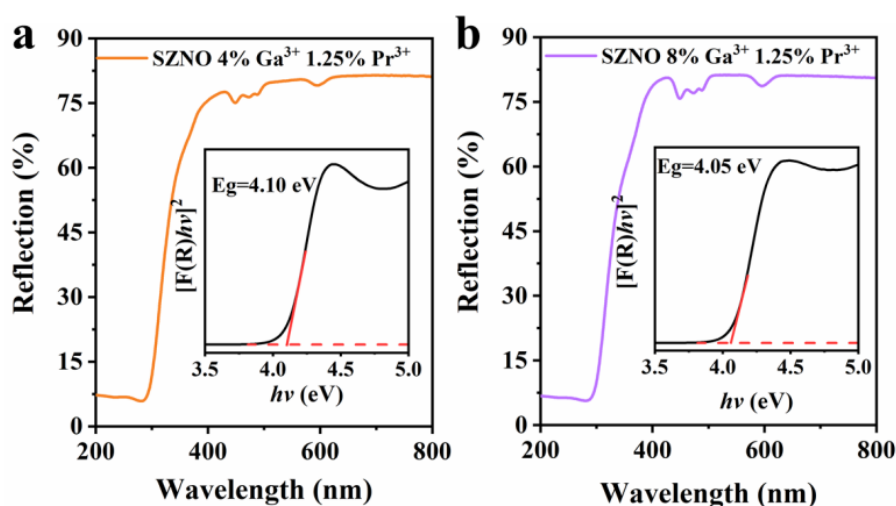

Fig. S3 The ultraviolet visible diffuse reflectance spectra (UV vis DRS) of the (a)  $\text{SrZn}_{0.33}\text{Nb}_{0.67}\text{O}_3$ : 4%  $\text{Ga}^{3+}$ , 1.25%  $\text{Pr}^{3+}$  and (b)  $\text{SrZn}_{0.33}\text{Nb}_{0.67}\text{O}_3$ : 8%  $\text{Ga}^{3+}$ , 1.25%  $\text{Pr}^{3+}$ ; the insets show the relationship of  $[F(R)hv]^2$  versus energy  $h\nu$ .

**Fig. S4**

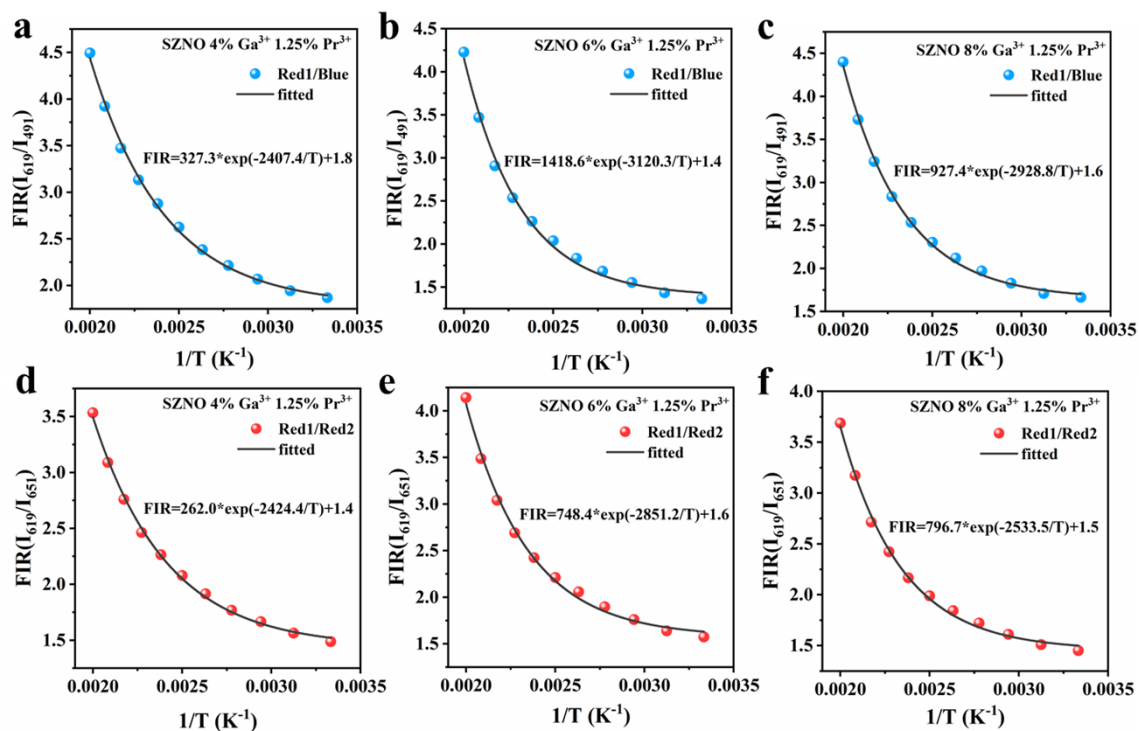

**Fig. S4** (a-c) Experimentally measured and Eq. 6 fitted plots of FIR ( $I_{619}/I_{491}$ ) versus temperature of the SrZn<sub>0.33</sub>Nb<sub>0.67</sub>O<sub>3</sub>: y% Ga<sup>3+</sup>, 1.25% (y=4/6/8); (d-f) Experimentally measured and Eq. 6 fitted plots of FIR ( $I_{619}/I_{651}$ ) versus temperature of the SrZn<sub>0.33</sub>Nb<sub>0.67</sub>O<sub>3</sub>: y% Ga<sup>3+</sup>, 1.25% (y=4/6/8).
